# Supplementary material for: Stability and photocurrent enhancement of photodetectors by using core/shell structured CsPbBr3/TiO2 quantum dots and 2D materials
Source: Royal Society of Chemistry journal article supplement (doi:10.1039/d3na01129a), 2024-01-01
Supplement: d3na01129a1.pdf [file d3na01129a1.pdf]

## Supporting Information

### Stability and Photocurrent Enhancement of Photodetectors by Core/Shell Structured CsPbBr<sub>3</sub>/TiO<sub>2</sub> Quantum Dot and 2D Materials

Chathurika Maduwanthi<sup>1</sup>, Chao-An Jong<sup>2</sup>, Waleed S. Mohammed<sup>3</sup>, Shu-Han Hsu<sup>1\*</sup>

<sup>1</sup> School of Integrated Science and Innovation, Sirindhorn International Institute of Technology, Thammasat University, Pathum Thani, 12120, Thailand.

<sup>2</sup> Taiwan Semiconductor Research Institute, National Applied Research Laboratories, Hsinchu 300091, Taiwan, R.O.C.

<sup>3</sup> Center of Research in Optoelectronics, Communication and Control Systems (BU-CROCCS), Bangkok University, Pathum Thani 12120, Thailand.

\*Corresponding Author's E-mail: [shuhanhsu@siit.tu.ac.th](mailto:shuhanhsu@siit.tu.ac.th).

#### Synthesis of CsPbBr<sub>3</sub> in Cs<sub>4</sub>PbBr<sub>6</sub> QDs

Figure S1 shows XRD and absorbance curves of CsPbBr<sub>3</sub> in Cs<sub>4</sub>PbBr<sub>6</sub> QDs, when CsBr: PbBr<sub>2</sub> molar ratio was 1:1.

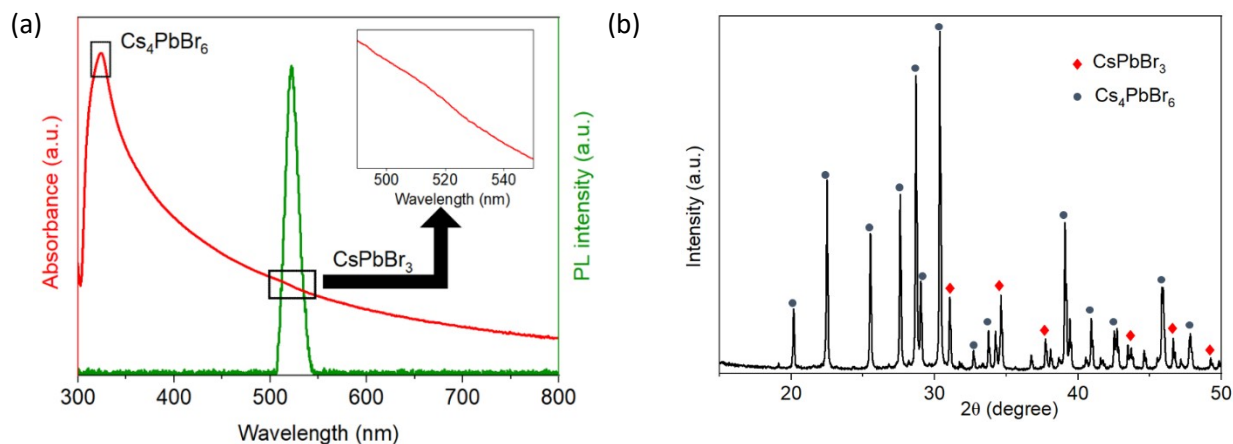

Figure S1: (a) Absorption and emission (b) XRD spectrum of CsPbBr<sub>3</sub> in Cs<sub>4</sub>PbBr<sub>6</sub> QDs.

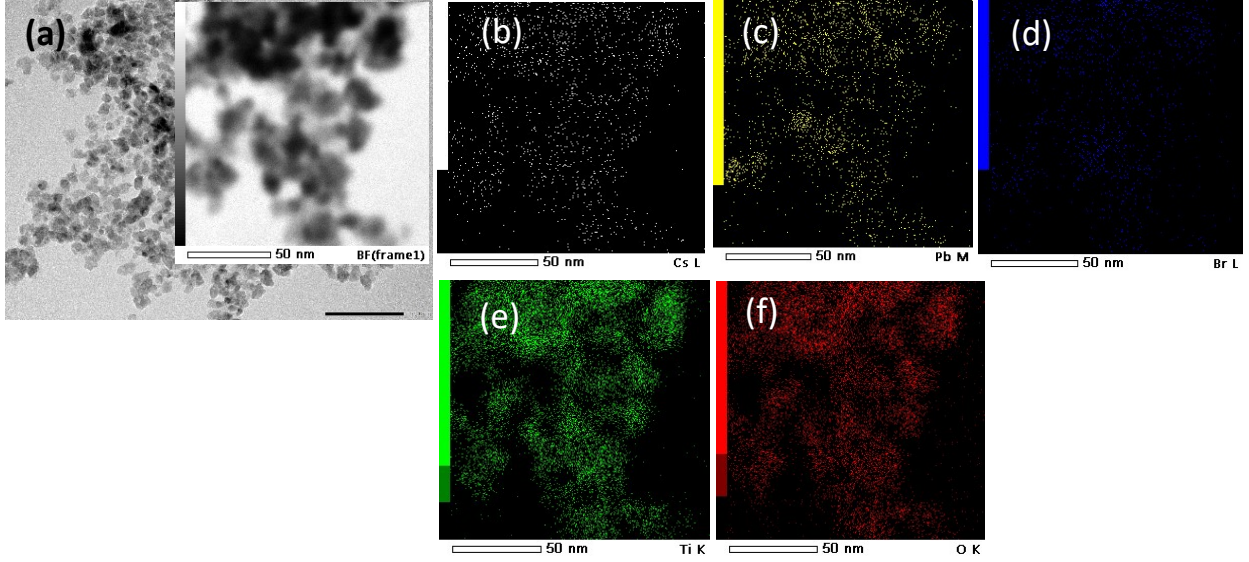

Figure S2: (a) TEM image of CsPbBr<sub>3</sub>/TiO<sub>2</sub> – core/shell structure along with the energy dispersive X-ray (EDX) elemental mapping profiles of (b-f) Cs, Pb, Br, Ti and O

$$\text{Responsivity } (R)(A/W) = \frac{I_{\text{light}} - I_{\text{dark}}}{P_{\text{inc}} \times A_{\text{active cross section}}}$$

$$P_{\text{inc}} = \text{laser power density}$$

$$\text{EQE} = \frac{h \times c \times R}{e \times \lambda}$$

$$D^* = \sqrt{\frac{A}{2e \times I_{\text{dark}}}} \times R$$

Table S1: Device performance of three PDs at 5 V.

| PD                                              | $I_{\text{ill}}$    | $I_{\text{dark}}$   | $\Delta I_{\text{ph}}$ | Response time (seconds) | Responsivity (R) (A/W) | EQE(%)                | Detectivity (Jones)  |
|-------------------------------------------------|---------------------|---------------------|------------------------|-------------------------|------------------------|-----------------------|----------------------|
| CsPbBr <sub>3</sub> QDs PD                      | $8 \pm 0.5$ nA      | $0 \pm 0.5$ nA      | $8.5 \pm 0.5$ nA       | 2.63                    | 0.1                    | $2.89 \times 10^{-1}$ | $3.9 \times 10^{13}$ |
| CsPbBr <sub>3</sub> /TiO <sub>2</sub> PD        | $38 \pm 0.5$ nA     | $20 \pm 0.5$ nA     | $18 \pm 0.5$ nA        | 3.63                    | 0.22                   | $6.12 \times 10^{-1}$ | $6.8 \times 10^{12}$ |
| CsPbBr <sub>3</sub> /TiO <sub>2</sub> /MXene PD | $750 \pm 1$ $\mu$ A | $450 \pm 1$ $\mu$ A | $300 \pm 1$ $\mu$ A    | 2.59                    | 3696                   | $1.02 \times 10^4$    | $7.6 \times 10^{14}$ |

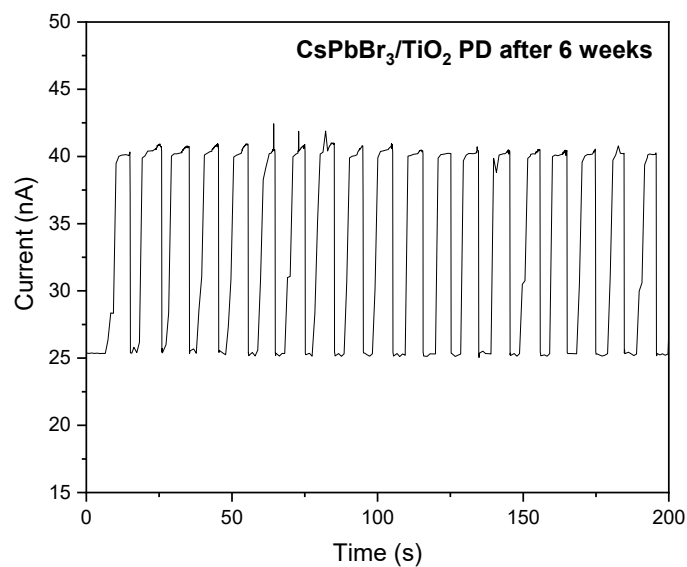

Figure S3 photocurrent – time response of the CsPbBr<sub>3</sub>/ TiO<sub>2</sub> photodetector measured in the dark and under illumination of blue laser with 200s alternatively pulse after storage in nitrogen box for six weeks.

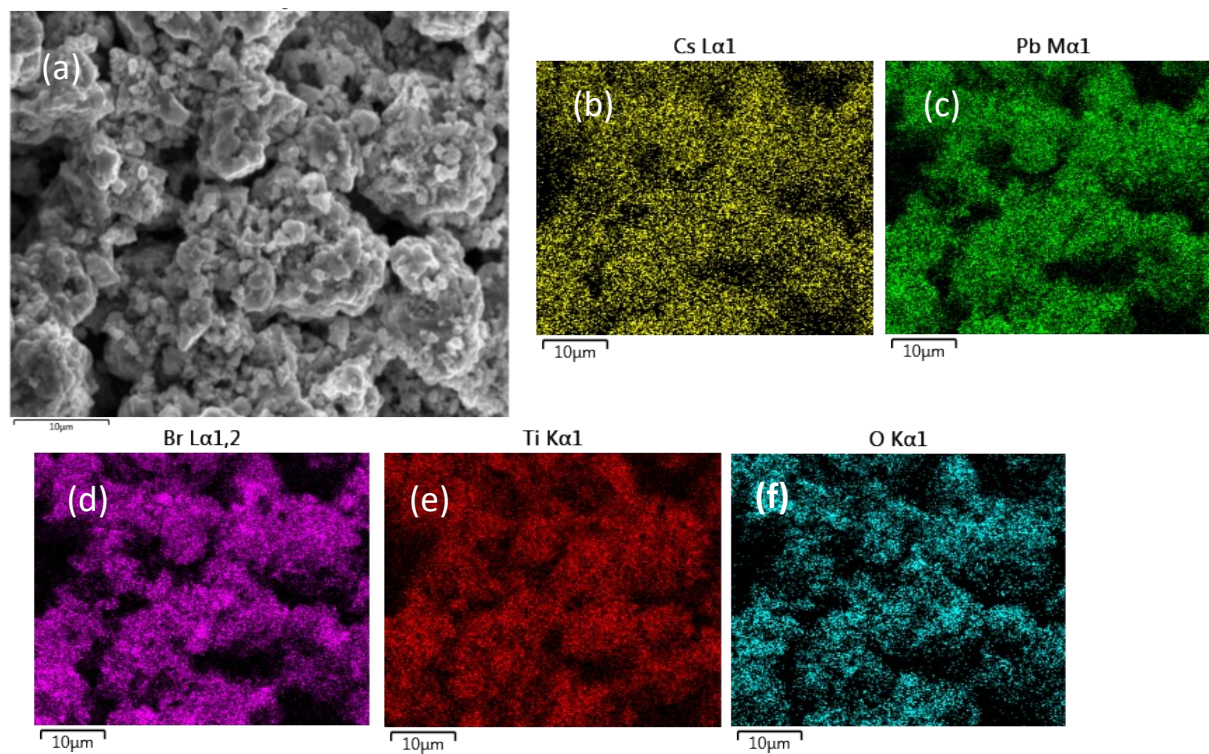

Figure S4: (a) SEM image of CsPbBr<sub>3</sub>/TiO<sub>2</sub> PD along with the energy dispersive X-ray (EDX) elemental mapping profiles of (b-f) Cs, Pb, Br, Ti and O

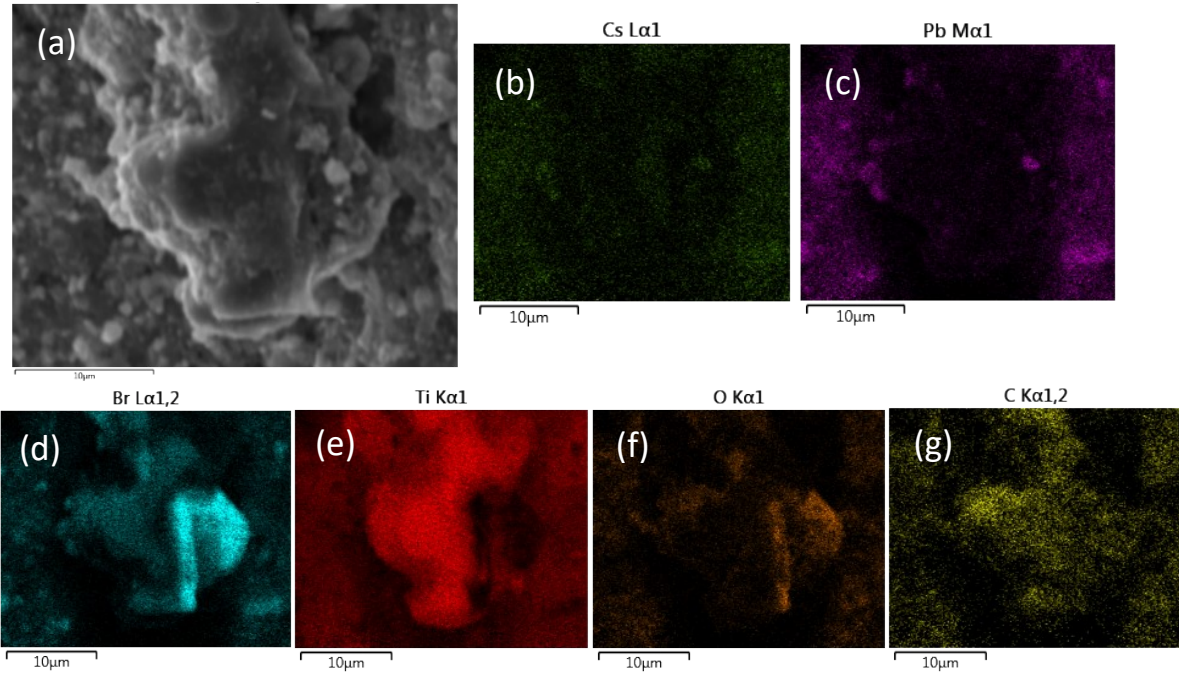

Figure S5: (a) SEM image of CsPbBr<sub>3</sub>/ TiO<sub>2</sub>/MXene PD along with the energy dispersive X-ray (EDX) elemental mapping profiles of (b-g) Cs, Pb, Br, Ti, O and C
